# Supplementary material
Source: MDPI journal article supplement (https://www.mdpi.com/2072-4292/15/15/3899)
Supplement: s1 [file s1]

Supporting Information for

## **Emerging Signal of Englacial Debris on One Clean Surface Glacier Based on High Spatial Resolution Remote Sensing Data in Northeastern Tibetan Plateau**

Yuwei Wu <sup>1</sup>, Wei Zhang <sup>2,\*</sup>, Shiqiang Zhang <sup>1</sup>, Zhonglei Mao <sup>1</sup>, Anan Chen <sup>1</sup>, Zhen Li <sup>2</sup>,  
Quan Zhang <sup>1</sup>, Zhongming Guo <sup>1</sup>, Xi Jiang <sup>3</sup> and Yongqing Long <sup>1</sup>

<sup>1</sup> Shaanxi Key Laboratory of Earth Surface System and Environmental Carrying Capacity,

College of Urban and Environmental Science, Northwest University, Xi'an 710127, China;

yuwei.wu@nwu.edu.cn (Y.W.); zhangsq@nwu.edu.cn (S.Z.);

maozl@stumail.nwu.edu.cn (Z.M.); aachen@nwu.edu.cn (A.C.);

zhangquanzq@nwu.edu.cn (Q.Z.); gzm@nwu.edu.cn (Z.G.); sjzxlyq@nwu.edu.cn (Y.L.)

<sup>2</sup> State Key Laboratory of Cryospheric Sciences, Northwest Institute of Eco-Environment and Resources, Chinese Academy of Sciences, Lanzhou 730000, China; lizhen@lzb.ac.cn

<sup>3</sup> Center for Data Assimilation Research and Application, School of Atmospheric Sciences, Nanjing University of Information Science & Technology, Nanjing 210044, China; jiangxi@nuist.edu.cn

\* Correspondence: zhangw06@lzb.ac.cn

### **Contents of this file**

Figures S1 to S2

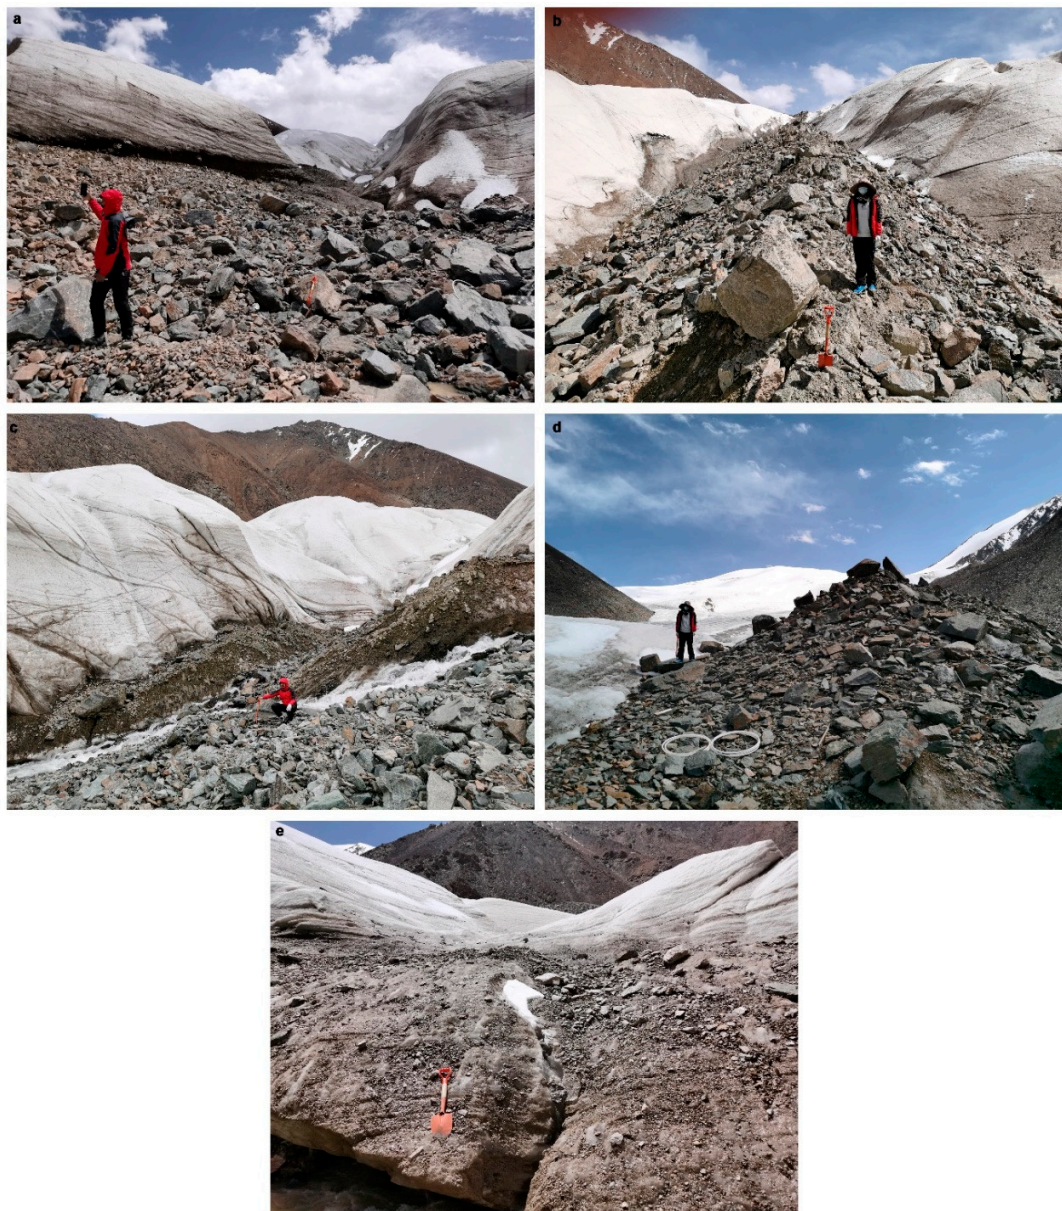

**Figure S1.** Exposed englacial debris in five zones A-E (a-e, respectively; taken on summer 2022).

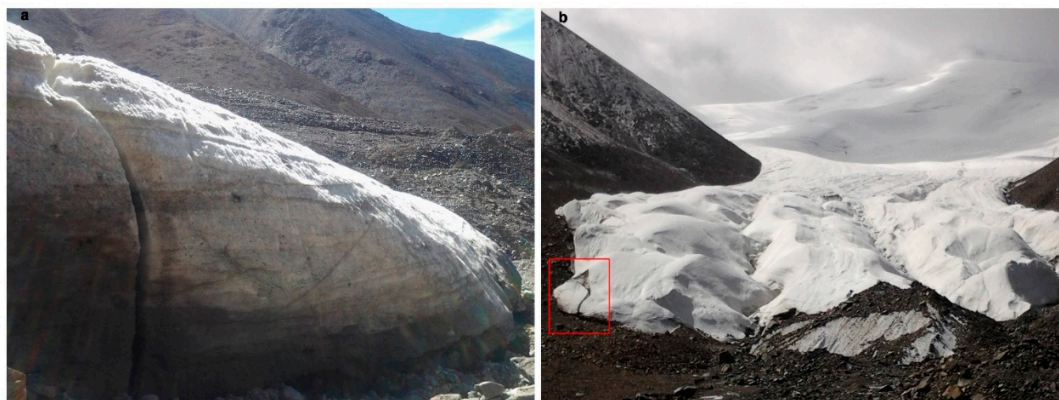

**Figure S2.** Ice disintegration in the terminus of the Qiyi Glacier that was first observed on summer 2013. a: ice crevasse; b: ice disintegration from the ice crevasse.
