# Supplementary material
Source: MDPI journal article supplement (https://www.mdpi.com/2072-4292/15/15/3899)
Supplement: s1 [file s1]

Archive with 3 entries (3 files):
- Figure S1.jpg
- Figure S2.jpg
- Supporting Information.pdf
